# Supplementary material
Source: MDPI journal article supplement (https://www.mdpi.com/1999-5903/13/4/102)
Supplement: s1 [file s1]

Archive with 1 entries (1 files):
- futureinternet-1153297-supplementary.pdf
