# Supplementary material
Source: MDPI journal article supplement (https://www.mdpi.com/1999-5903/13/4/102)
Supplement: s1 [file s1 › futureinternet-1153297-supplementary.pdf]

# Supplementary Materials

## Dataset Analysis

**Table S1.** Dataset analysis.

| Attribute             | Analysis            | Value                                                                                                           |
|-----------------------|---------------------|-----------------------------------------------------------------------------------------------------------------|
| abdominal_pain        | Description         | Symptom and sign information collected at the time of notification                                              |
| abdominal_pain        | Type of Data        | Name (String)                                                                                                   |
| abdominal_pain        | Example             | 0                                                                                                               |
| abdominal_pain        | Filled              | 16.64%                                                                                                          |
| abdominal_pain        | Possible Values     | 0 = You don't have the Attribute,                                                                               |
| abdominal_pain        | Possible Values     | 1 = Has the Attribute,                                                                                          |
| abdominal_pain        | Possible Values     | "" = Missing                                                                                                    |
| abdominal_pain        | Data Quality Issues | Replace values "" = Missing, to 0 = You do not have the Attribute.                                              |
| acute_renal_infirmity | Description         | Information on whether the patient has acute renal failure as a comorbidity [discontinued on 26 November 2020]. |
| acute_renal_infirmity | Type of Data        | Name (String)                                                                                                   |
| acute_renal_infirmity | Example             | 0                                                                                                               |
| acute_renal_infirmity | Filled              | 60.14%                                                                                                          |
| acute_renal_infirmity | Possible Values     | 0 = You don't have the Attribute,                                                                               |
| acute_renal_infirmity | Possible Values     | 1 = Has the Attribute,                                                                                          |
| acute_renal_infirmity | Possible Values     | "" = Missing                                                                                                    |
| acute_renal_infirmity | Data Quality Issues | Replace values "" = Missing, to 0 = You do not have the Attribute.                                              |
| analysis_1            | Description         | Type of test performed                                                                                          |
| analysis_1            | Type of Data        | Name (String)                                                                                                   |
| analysis_1            | Example             | PCR                                                                                                             |
| analysis_1            | Filled              | 91.78%                                                                                                          |
| analysis_1            | Possible Values     | PCR, ANTIGEN                                                                                                    |
| analysis_1            | Data Quality Issues | There are records with no associated test.                                                                      |
| arthralgia            | Description         | Symptom and sign information collected at the time of notification                                              |
| arthralgia            | Type of Data        | Name (String)                                                                                                   |
| arthralgia            | Example             | 0                                                                                                               |
| arthralgia            | Filled              | 60.14%                                                                                                          |
| arthralgia            | Possible Values     | 0 = You don't have the Attribute,                                                                               |
| arthralgia            | Possible Values     | 1 = Has the Attribute,                                                                                          |
| arthralgia            | Possible Values     | "" = Missing                                                                                                    |
| arthralgia            | Data Quality Issues | Replace values "" = Missing, to 0 = You do not have the Attribute.                                              |
| asthma                | Description         | Information on whether the patient has asthma as a comorbidity.                                                 |
| asthma                | Type of Data        | Name (String)                                                                                                   |
| asthma                | Example             | 0                                                                                                               |
| asthma                | Filled              | 60.14%                                                                                                          |
| asthma                | Possible Values     | 0 = You don't have the Attribute,                                                                               |
| asthma                | Possible Values     | 1 = Has the Attribute,                                                                                          |
| asthma                | Possible Values     | "" = Missing                                                                                                    |

|                                 |                     |                                                                                                                             |
|---------------------------------|---------------------|-----------------------------------------------------------------------------------------------------------------------------|
| asthma                          | Data Quality Issues | Replace values "" = Missing, to 0 = You do not have the Attribute.                                                          |
| auscultation_anomalous          | Description         | Symptom and sign information collected at the time of notification [discontinued]                                           |
| auscultation_anomalous          | Type of Data        | Name (String)                                                                                                               |
| auscultation_anomalous          | Example             | 0                                                                                                                           |
| auscultation_anomalous          | Filled              | 60.14%                                                                                                                      |
| auscultation_anomalous          | Possible Values     | 0 = You don't have the Attribute,                                                                                           |
| auscultation_anomalous          | Possible Values     | 1 = Has the Attribute,                                                                                                      |
| auscultation_anomalous          | Possible Values     | "" = Missing                                                                                                                |
| auscultation_anomalous          | Data Quality Issues | Replace values "" = Missing, to 0 = You do not have the Attribute.                                                          |
| cardiac_infirmity               | Description         | Information on whether the patient has heart failure as a comorbidity [discontinued].                                       |
| cardiac_infirmity               | Type of Data        | Name (String)                                                                                                               |
| cardiac_infirmity               | Example             | 0                                                                                                                           |
| cardiac_infirmity               | Filled              | 60.14%                                                                                                                      |
| cardiac_infirmity               | Possible Values     | 0 = You don't have the Attribute,                                                                                           |
| cardiac_infirmity               | Possible Values     | 1 = Has the Attribute,                                                                                                      |
| cardiac_infirmity               | Possible Values     | "" = Missing                                                                                                                |
| cardiac_infirmity               | Data Quality Issues | Replace values "" = Missing, to 0 = You do not have the Attribute.                                                          |
| chest_pain                      | Description         | Symptom and sign information collected at the time of notification                                                          |
| chest_pain                      | Type of Data        | Name (String)                                                                                                               |
| chest_pain                      | Example             | 0                                                                                                                           |
| chest_pain                      | Filled              | 16.98%                                                                                                                      |
| chest_pain                      | Possible Values     | 0 = You don't have the Attribute,                                                                                           |
| chest_pain                      | Possible Values     | 1 = Has the Attribute,                                                                                                      |
| chest_pain                      | Possible Values     | "" = Missing                                                                                                                |
| chest_pain                      | Data Quality Issues | Replace values "" = Missing, to 0 = You do not have the Attribute.                                                          |
| chronic_hematologic_disease     | Description         | Information on whether the patient has chronic hematological diseases such as comorbidity.                                  |
| chronic_hematologic_disease     | Type of Data        | Name (String)                                                                                                               |
| chronic_hematologic_disease     | Example             | 0                                                                                                                           |
| chronic_hematologic_disease     | Filled              | 60.14%                                                                                                                      |
| chronic_hematologic_disease     | Possible Values     | 0 = You don't have the Attribute,                                                                                           |
| chronic_hematologic_disease     | Possible Values     | 1 = Has the Attribute,                                                                                                      |
| chronic_hematologic_disease     | Possible Values     | "" = Missing                                                                                                                |
| chronic_hematologic_disease     | Data Quality Issues | Replace values "" = Missing, to 0 = You do not have the attribute.                                                          |
| chronic_neurological_deficiency | Description         | Information on whether the patient has chronic neurological deficiency as a comorbidity [discontinued on 26 November 2020]. |
| chronic_neurological_deficiency | Type of Data        | Name (String)                                                                                                               |
| chronic_neurological_deficiency | Example             | 0                                                                                                                           |
| chronic_neurological_deficiency | Filled              | 60.14%                                                                                                                      |
| chronic_neurological_deficiency | Possible Values     | 0 = You don't have the Attribute,                                                                                           |
| chronic_neurological_deficiency | Possible Values     | 1 = Has the Attribute,                                                                                                      |
| chronic_neurological_deficiency | Possible Values     | "" = Missing                                                                                                                |

|                                 |                     |                                                                                                                                           |
|---------------------------------|---------------------|-------------------------------------------------------------------------------------------------------------------------------------------|
| chronic_neurological_deficiency | Data Quality Issues | Replace values "" = Missing, to 0 = You do not have the Attribute.                                                                        |
| chronic_pulmonary_disease       | Description         | Information on whether the patient has any chronic lung disease as a comorbidity.                                                         |
| chronic_pulmonary_disease       | Type of Data        | Name (String)                                                                                                                             |
| chronic_pulmonary_disease       | Example             | 0                                                                                                                                         |
| chronic_pulmonary_disease       | Filled              | 60.14%                                                                                                                                    |
| chronic_pulmonary_disease       | Possible Values     | 0 = You don't have the Attribute,                                                                                                         |
| chronic_pulmonary_disease       | Possible Values     | 1 = Has the Attribute,                                                                                                                    |
| chronic_pulmonary_disease       | Possible Values     | "" = Missing                                                                                                                              |
| chronic_pulmonary_disease       | Data Quality Issues | Replace values "" = Missing, to 0 = You do not have the Attribute.                                                                        |
| chronic_renal_disease           | Description         | Information on whether the patient has chronic kidney disease as a comorbidity.                                                           |
| chronic_renal_disease           | Type of Data        | Name (String)                                                                                                                             |
| chronic_renal_disease           | Example             | 0                                                                                                                                         |
| chronic_renal_disease           | Filled              | 60.14%                                                                                                                                    |
| chronic_renal_disease           | Possible Values     | 0 = You don't have the Attribute,                                                                                                         |
| chronic_renal_disease           | Possible Values     | 1 = Has the Attribute,                                                                                                                    |
| chronic_renal_disease           | Possible Values     | "" = Missing                                                                                                                              |
| chronic_renal_disease           | Data Quality Issues | Replace values "" = Missing, to 0 = You do not have the Attribute.                                                                        |
| code_municipality_address_user  | Description         | Code for the municipality of Portugal that corresponds to the address of the confirmed case, according to the National Registry of Users. |
| code_municipality_address_user  | Type of Data        | Number (Integer)                                                                                                                          |
| code_municipality_address_user  | Example             | 3109                                                                                                                                      |
| code_municipality_address_user  | Filled              | 97.63%                                                                                                                                    |
| code_municipality_address_user  | Possible Values     | Code of municipalities                                                                                                                    |
| code_municipality_address_user  | Data Quality Issues | There is a registration without a county code associated with the user's address.                                                         |
| code_municipality_occurrence    | Description         | Code for the municipality of Portugal where the confirmed case is residing                                                                |
| code_municipality_occurrence    | Type of Data        | Name (String)                                                                                                                             |
| code_municipality_occurrence    | Example             | 3108                                                                                                                                      |
| code_municipality_occurrence    | Filled              | 28.11%                                                                                                                                    |
| code_municipality_occurrence    | Possible Values     | Code of municipalities                                                                                                                    |
| code_municipality_occurrence    | Data Quality Issues | There are records without a county code of occurrence of the associated user.                                                             |
| coma                            | Description         | Symptom and sign information collected at the time of notification<br>[discontinued]                                                      |
| coma                            | Type of Data        | Name (String)                                                                                                                             |
| coma                            | Example             | 0                                                                                                                                         |
| coma                            | Filled              | 60.14%                                                                                                                                    |
| coma                            | Possible Values     | 0 = You don't have the Attribute,                                                                                                         |
| coma                            | Possible Values     | 1 = Has the Attribute,                                                                                                                    |
| coma                            | Possible Values     | "" = Missing                                                                                                                              |

|                          |                     |                                                                                                  |
|--------------------------|---------------------|--------------------------------------------------------------------------------------------------|
| coma                     | Data Quality Issues | Replace values "" = Missing, to 0 = You do not have the Attribute.                               |
| confirmation_rule        | Description         | Form identifying the confirmed case of SARS-CoV-2/COVID-19                                       |
| confirmation_rule        | Type of Data        | Name (String)                                                                                    |
| confirmation_rule        | Example             | Clinical Notification                                                                            |
| confirmation_rule        | Filled              | 1                                                                                                |
| confirmation_rule        | Possible Values     | Case/Clinical Notification/Laboratory Notification                                               |
| confirmation_rule        | Data Quality Issues | No data quality problems identified                                                              |
| consumption_coagulopathy | Description         | Information on whether the patient has consumption coagulopathy as a comorbidity [discontinued]. |
| consumption_coagulopathy | Type of Data        | Name (String)                                                                                    |
| consumption_coagulopathy | Example             | 0                                                                                                |
| consumption_coagulopathy | Filled              | 60.14%                                                                                           |
| consumption_coagulopathy | Possible Values     | 0 = You don't have the Attribute,                                                                |
| consumption_coagulopathy | Possible Values     | 1 = Has the Attribute,                                                                           |
| consumption_coagulopathy | Possible Values     | "" = Missing                                                                                     |
| consumption_coagulopathy | Data Quality Issues | Replace values "" = Missing, to 0 = You do not have the Attribute.                               |
| convulsions              | Description         | Symptom and sign information collected at the time of notification                               |
| convulsions              | Type of Data        | Name (String)                                                                                    |
| convulsions              | Example             | 0                                                                                                |
| convulsions              | Filled              | 60.14%                                                                                           |
| convulsions              | Possible Values     | 0 = You don't have the Attribute,                                                                |
| convulsions              | Possible Values     | 1 = Has the Attribute,                                                                           |
| convulsions              | Possible Values     | "" = Missing                                                                                     |
| convulsions              | Data Quality Issues | Replace values "" = Missing, to 0 = You do not have the Attribute.                               |
| coryza                   | Description         | Symptom and sign information collected at the time of notification                               |
| coryza                   | Type of Data        | Name (String)                                                                                    |
| coryza                   | Example             | 0                                                                                                |
| coryza                   | Filled              | 20.72%                                                                                           |
| coryza                   | Possible Values     | 0 = You don't have the Attribute,                                                                |
| coryza                   | Possible Values     | 1 = Has the Attribute,                                                                           |
| coryza                   | Possible Values     | "" = Missing                                                                                     |
| coryza                   | Data Quality Issues | Replace values "" = Missing, to 0 = You do not have the Attribute.                               |
| date_confirmed           | Description         | Date the person was identified as a confirmed case of infection by SARS-CoV-2/COVID-19.          |
| date_confirmed           | Type of Data        | String                                                                                           |
| date_confirmed           | Example             | 44222                                                                                            |
| date_confirmed           | Filled              | 1                                                                                                |
| date_confirmed           | Possible Values     | Dates between 02/03/2020 to 28/02/2021                                                           |
| date_confirmed           | Data Quality Issues | No data quality problems identified                                                              |
| date_obit                | Description         | Date of the patient dying with SARS-CoV-2/COVID-19.                                              |
| date_obit                | Type of Data        | Data (date)                                                                                      |
| date_obit                | Example             | 44482                                                                                            |

|                                         |                     |                                                                                                                                         |
|-----------------------------------------|---------------------|-----------------------------------------------------------------------------------------------------------------------------------------|
| date_obit                               | Filled              | 1.98%                                                                                                                                   |
| date_obit                               | Possible Values     | Dates between 02/03/2020 and 08/03/2021                                                                                                 |
| date_obit                               | Data Quality Issues | Events without date                                                                                                                     |
| date_of_start_of_symptoms               | Description         | Symptom onset date                                                                                                                      |
| date_of_start_of_symptoms               | Type of Data        | Date                                                                                                                                    |
| date_of_start_of_symptoms               | Example             | 44214                                                                                                                                   |
| date_of_start_of_symptoms               | Filled              | 34.76%                                                                                                                                  |
| date_of_start_of_symptoms               | Possible Values     | Dates between 02/03/2020 to 02/27/2021                                                                                                  |
| date_of_start_of_symptoms               | Data Quality Issues | There are records with no associated values. Replace the blank values with "NA".                                                        |
| description_municipality_correspondence | Description         | Name of the municipality of Portugal that corresponds to the address of the confirmed case, according to the National Registry of Users |
| description_municipality_correspondence | Type of Data        | Name (String)                                                                                                                           |
| description_municipality_correspondence | Example             | Braga                                                                                                                                   |
| description_municipality_correspondence | Filled              | 97.26%                                                                                                                                  |
| description_municipality_correspondence | Possible Values     | List of municipalities in Portugal                                                                                                      |
| description_municipality_correspondence | Data Quality Issues | There are records without a description of the county associated with the user's address.                                               |
| description_municipality_occurrence     | Description         | Name of the municipality of Portugal where the confirmed case is residing                                                               |
| description_municipality_occurrence     | Type of Data        | String (Name)                                                                                                                           |
| description_municipality_occurrence     | Example             | Guimarães                                                                                                                               |
| description_municipality_occurrence     | Filled              | 28.11%                                                                                                                                  |
| description_municipality_occurrence     | Possible Values     | List of municipalities in Portugal                                                                                                      |
| description_municipality_occurrence     | Data Quality Issues | There are records without a description of the county associated with the user's address.                                               |
| diabetes                                | Description         | Information on whether the patient has a known history of Diabetes insipidus or Diabetes Mellitus type 1.2 or gestational               |
| diabetes                                | Type of Data        | Name (String)                                                                                                                           |
| diabetes                                | Example             | 0                                                                                                                                       |
| diabetes                                | Filled              | 60.14%                                                                                                                                  |
| diabetes                                | Possible Values     | 0 = You don't have the Attribute,                                                                                                       |
| diabetes                                | Possible Values     | 1 = Has the Attribute,                                                                                                                  |
| diabetes                                | Possible Values     | "" = Missing                                                                                                                            |
| diabetes                                | Data Quality Issues | Replace values "" = Missing, to 0 = You do not have the Attribute.                                                                      |
| diarrhea                                | Description         | Symptom and sign information collected at the time of notification                                                                      |
| diarrhea                                | Type of Data        | Name (String)                                                                                                                           |

|                              |                     |                                                                                        |
|------------------------------|---------------------|----------------------------------------------------------------------------------------|
| diarrhea                     | Example             | 0                                                                                      |
| diarrhea                     | Filled              | 60.14%                                                                                 |
| diarrhea                     | Possible Values     | 0 = You don't have the Attribute,                                                      |
| diarrhea                     | Possible Values     | 1 = Has the Attribute,                                                                 |
| diarrhea                     | Possible Values     | "" = Missing                                                                           |
| diarrhea                     | Data Quality Issues | Replace values "" = Missing, to 0 = You do not have the Attribute.                     |
| disease_presentation         | Description         | Symptom and sign information collected at the time of notification                     |
| disease_presentation         | Type of Data        | Name (String)                                                                          |
| disease_presentation         | Example             | Asymptomatic                                                                           |
| disease_presentation         | Filled              | 42.64%                                                                                 |
| disease_presentation         | Possible Values     | Asymptomatic/Symptomatic                                                               |
| disease_presentation         | Data Quality Issues | There is a record without Description for the presentation of the disease in the user. |
| dry_or_productive_cough      | Description         | Symptom and sign information collected at the time of notification                     |
| dry_or_productive_cough      | Type of Data        | Name (String)                                                                          |
| dry_or_productive_cough      | Example             | 0                                                                                      |
| dry_or_productive_cough      | Filled              | 28.09%                                                                                 |
| dry_or_productive_cough      | Possible Values     | 0 = You don't have the Attribute,                                                      |
| dry_or_productive_cough      | Possible Values     | 1 = Has the Attribute,                                                                 |
| dry_or_productive_cough      | Possible Values     | "" = Missing                                                                           |
| dry_or_productive_cough      | Data Quality Issues | Replace values "" = Missing, to 0 = You do not have the Attribute.                     |
| during_incubation_period     | Attribute           | fora_de_portugal                                                                       |
| during_incubation_period     | Description         | If the user was outside Portugal in the 14 days prior to the notification date.        |
| during_incubation_period     | Type of Data        | Name (String)                                                                          |
| during_incubation_period     | Example             | 0                                                                                      |
| during_incubation_period     | Filled              | 26.13%                                                                                 |
| during_incubation_period     | Possible Values     | 0 = You don't have the Attribute,                                                      |
| during_incubation_period     | Possible Values     | 1 = Has the Attribute,                                                                 |
| during_incubation_period     | Possible Values     | "" = Missing                                                                           |
| during_incubation_period     | Data Quality Issues | Replace values "" = Missing, to 0 = You do not have the Attribute.                     |
| dyspnea                      | Description         | Symptom and sign information collected at the time of notification                     |
| dyspnea                      | Type of Data        | Name (String)                                                                          |
| dyspnea                      | Example             | 0                                                                                      |
| dyspnea                      | Filled              | 19.36%                                                                                 |
| dyspnea                      | Possible Values     | 0 = You don't have the Attribute,                                                      |
| dyspnea                      | Possible Values     | 1 = Has the Attribute,                                                                 |
| dyspnea                      | Possible Values     | "" = Missing                                                                           |
| dyspnea                      | Data Quality Issues | Replace values "" = Missing, to 0 = You do not have the Attribute.                     |
| general_weakness_or_asthenia | Description         | Symptom and sign information collected at the time of notification                     |
| general_weakness_or_asthenia | Type of Data        | Name (String)                                                                          |
| general_weakness_or_asthenia | Example             | 0                                                                                      |

|                              |                     |                                                                                                |
|------------------------------|---------------------|------------------------------------------------------------------------------------------------|
| general_weakness_or_asthenia | Filled              | 18.82%                                                                                         |
| general_weakness_or_asthenia | Possible Values     | 0 = You don't have the Attribute,                                                              |
| general_weakness_or_asthenia | Possible Values     | 1 = Has the Attribute,                                                                         |
| general_weakness_or_asthenia | Possible Values     | "" = Missing                                                                                   |
| general_weakness_or_asthenia | Data Quality Issues | Replace values "" = Missing, to 0 = You do not have the Attribute.                             |
| headache                     | Description         | Symptom and sign information collected at the time of notification                             |
| headache                     | Type of Data        | Name (String)                                                                                  |
| headache                     | Example             | 0                                                                                              |
| headache                     | Filled              | 23.15%                                                                                         |
| headache                     | Possible Values     | 0 = You don't have the Attribute,                                                              |
| headache                     | Possible Values     | 1 = Has the Attribute,                                                                         |
| headache                     | Possible Values     | "" = Missing                                                                                   |
| headache                     | Data Quality Issues | Replace values "" = Missing, to 0 = You do not have the Attribute.                             |
| history_of_fever_or_chills   | Description         | Symptom and sign information collected at the time of notification                             |
| history_of_fever_or_chills   | Type of Data        | Name (String)                                                                                  |
| history_of_fever_or_chills   | Example             | 0                                                                                              |
| history_of_fever_or_chills   | Filled              | 25.70%                                                                                         |
| history_of_fever_or_chills   | Possible Values     | 0 = You don't have the Attribute,                                                              |
| history_of_fever_or_chills   | Possible Values     | 1 = Has the Attribute,                                                                         |
| history_of_fever_or_chills   | Possible Values     | "" = Missing                                                                                   |
| history_of_fever_or_chills   | Data Quality Issues | Replace values "" = Missing, to 0 = You do not have the Attribute.                             |
| hiv_other_immunodeficiencies | Description         | Information about whether the patient has HIV or other immunodeficiencies such as comorbidity. |
| hiv_other_immunodeficiencies | Type of Data        | Name (String)                                                                                  |
| hiv_other_immunodeficiencies | Example             | 0                                                                                              |
| hiv_other_immunodeficiencies | Filled              | 60.14%                                                                                         |
| hiv_other_immunodeficiencies | Possible Values     | 0 = You don't have the Attribute,                                                              |
| hiv_other_immunodeficiencies | Possible Values     | 1 = Has the Attribute,                                                                         |
| hiv_other_immunodeficiencies | Possible Values     | "" = Missing                                                                                   |
| hiv_other_immunodeficiencies | Data Quality Issues | Replace values "" = Missing, to 0 = You do not have the Attribute.                             |
| irritability_confusion       | Description         | Symptom and sign information collected at the time of notification [discontinued]              |
| irritability_confusion       | Type of Data        | Name (String)                                                                                  |
| irritability_confusion       | Example             | 0                                                                                              |
| irritability_confusion       | Filled              | 60.14%                                                                                         |
| irritability_confusion       | Possible Values     | 0 = You don't have the Attribute,                                                              |
| irritability_confusion       | Possible Values     | 1 = Has the Attribute,                                                                         |
| irritability_confusion       | Possible Values     | "" = Missing                                                                                   |
| irritability_confusion       | Data Quality Issues | Replace values "" = Missing, to 0 = You do not have the Attribute.                             |
| liver_pathology              | Description         | Information on whether the patient has any liver disease as a comorbidity.                     |
| liver_pathology              | Type of Data        | Name (String)                                                                                  |
| liver_pathology              | Example             | 0                                                                                              |
| liver_pathology              | Filled              | 60.14%                                                                                         |

|                                       |                     |                                                                                                                            |
|---------------------------------------|---------------------|----------------------------------------------------------------------------------------------------------------------------|
| liver_pathology                       | Possible Values     | 0 = You don't have the Attribute,                                                                                          |
| liver_pathology                       | Possible Values     | 1 = Has the Attribute,                                                                                                     |
| liver_pathology                       | Possible Values     | "" = Missing                                                                                                               |
| liver_pathology                       | Data Quality Issues | Replace values "" = Missing, to 0 = You do not have the Attribute.                                                         |
| lung_x-ray_with_alterations           | Description         | Symptom and sign information collected at the time of notification [discontinued ]                                         |
| lung_x-ray_with_alterations           | Type of Data        | Name (String)                                                                                                              |
| lung_x-ray_with_alterations           | Example             | 0                                                                                                                          |
| lung_x-ray_with_alterations           | Filled              | 60.14%                                                                                                                     |
| lung_x-ray_with_alterations           | Possible Values     | 0 = You don't have the Attribute,                                                                                          |
| lung_x-ray_with_alterations           | Possible Values     | 1 = Has the Attribute,                                                                                                     |
| lung_x-ray_with_alterations           | Possible Values     | "" = Missing                                                                                                               |
| lung_x-ray_with_alterations           | Data Quality Issues | Replace values "" = Missing, to 0 = You do not have the Attribute.                                                         |
| myalgias                              | Description         | Symptom and sign information collected at the time of notification                                                         |
| myalgias                              | Type of Data        | Name (String)                                                                                                              |
| myalgias                              | Example             | 0                                                                                                                          |
| myalgias                              | Filled              | 23.64%                                                                                                                     |
| myalgias                              | Possible Values     | 0 = You don't have the Attribute,                                                                                          |
| myalgias                              | Possible Values     | 1 = Has the Attribute,                                                                                                     |
| myalgias                              | Possible Values     | "" = Missing                                                                                                               |
| myalgias                              | Data Quality Issues | Replace values "" = Missing, to 0 = You do not have the Attribute.                                                         |
| nausea_vomiting                       | Description         | Symptom and sign information collected at the time of notification                                                         |
| nausea_vomiting                       | Type of Data        | Name (String)                                                                                                              |
| nausea_vomiting                       | Example             | 0                                                                                                                          |
| nausea_vomiting                       | Filled              | 60.14%                                                                                                                     |
| nausea_vomiting                       | Possible Values     | 0 = You don't have the Attribute,                                                                                          |
| nausea_vomiting                       | Possible Values     | 1 = Has the Attribute,                                                                                                     |
| nausea_vomiting                       | Possible Values     | "" = Missing                                                                                                               |
| nausea_vomiting                       | Data Quality Issues | Replace values "" = Missing, to 0 = You do not have the Attribute.                                                         |
| neoplasia                             | Description         | Information on whether the patient has neoplasia as a comorbidity                                                          |
| neoplasia                             | Type of Data        | Name (String)                                                                                                              |
| neoplasia                             | Example             | 0                                                                                                                          |
| neoplasia                             | Filled              | 60.14%                                                                                                                     |
| neoplasia                             | Possible Values     | 0 = You don't have the Attribute,                                                                                          |
| neoplasia                             | Possible Values     | 1 = Has the Attribute,                                                                                                     |
| neoplasia                             | Possible Values     | "" = Missing                                                                                                               |
| neoplasia                             | Data Quality Issues | Replace values "" = Missing, to 0 = You do not have the Attribute.                                                         |
| neurological_or_neuromuscular_disease | Description         | Information on whether the patient has chronic neurological or neuromuscular disorders such as comorbidity [discontinued]. |
| neurological_or_neuromuscular_disease | Type of Data        | Name (String)                                                                                                              |
| neurological_or_neuromuscular_disease | Example             | 0                                                                                                                          |

|                                       |                     |                                                                                   |
|---------------------------------------|---------------------|-----------------------------------------------------------------------------------|
| neurological_or_neuromuscular_disease | Filled              | 60.14%                                                                            |
| neurological_or_neuromuscular_disease | Possible Values     | 0 = You don't have the Attribute,                                                 |
| neurological_or_neuromuscular_disease | Possible Values     | 1 = Has the Attribute,                                                            |
| neurological_or_neuromuscular_disease | Possible Values     | "" = Missing                                                                      |
| neurological_or_neuromuscular_disease | Data Quality Issues | Replace values "" = Missing, to 0 = You do not have the Attribute.                |
| odynophagia                           | Description         | Symptom and sign information collected at the time of notification                |
| odynophagia                           | Type of Data        | Name (String)                                                                     |
| odynophagia                           | Example             | 0                                                                                 |
| odynophagia                           | Filled              | 19.99%                                                                            |
| odynophagia                           | Possible Values     | 0 = You don't have the Attribute,                                                 |
| odynophagia                           | Possible Values     | 1 = Has the Attribute,                                                            |
| odynophagia                           | Possible Values     | "" = Missing                                                                      |
| odynophagia                           | Data Quality Issues | Replace values "" = Missing, to 0 = You do not have the Attribute.                |
| parent_nationality                    | Description         | Nationality of the confirmed case.                                                |
| parent_nationality                    | Type of Data        | Name (String)                                                                     |
| parent_nationality                    | Example             | Portugal                                                                          |
| parent_nationality                    | Filled              | 98.81%                                                                            |
| parent_nationality                    | Possible Values     | Nationality of the user of the confirmed case.                                    |
| parent_nationality                    | Data Quality Issues | There are records without associated user nationality.                            |
| patient_gender                        | Description         | Gender of confirmed case                                                          |
| patient_gender                        | Type of Data        | Character                                                                         |
| patient_gender                        | Example             | F                                                                                 |
| patient_gender                        | Filled              | 99.97%                                                                            |
| patient_gender                        | Possible Values     | F/M                                                                               |
| patient_gender                        | Data Quality Issues | There are records with no associated gender.                                      |
| pneumonia                             | Description         | Symptom and sign information collected at the time of notification                |
| pneumonia                             | Type of Data        | Name (String)                                                                     |
| pneumonia                             | Example             | 0                                                                                 |
| pneumonia                             | Filled              | 7.76%                                                                             |
| pneumonia                             | Possible Values     | 0 = You don't have the Attribute,                                                 |
| pneumonia                             | Possible Values     | 1 = Has the Attribute,                                                            |
| pneumonia                             | Possible Values     | "" = Missing                                                                      |
| pneumonia                             | Data Quality Issues | Replace values "" = Missing, to 0 = You do not have the Attribute.                |
| tachycardia                           | Description         | Symptom and sign information collected at the time of notification [discontinued] |
| tachycardia                           | Type of Data        | Name (String)                                                                     |
| tachycardia                           | Example             | 0                                                                                 |
| tachycardia                           | Filled              | 60.14%                                                                            |
| tachycardia                           | Possible Values     | 0 = You don't have the Attribute,                                                 |
| tachycardia                           | Possible Values     | 1 = Has the Attribute,                                                            |
| tachycardia                           | Possible Values     | "" = Missing                                                                      |

|                               |                     |                                                                                                                     |
|-------------------------------|---------------------|---------------------------------------------------------------------------------------------------------------------|
| tachycardia                   | Data Quality Issues | Replace values "" = Missing, to 0 = You do not have the Attribute.                                                  |
| the_patient_has_comorbidities | Description         | Information on whether the patient has comorbidities at the date of notification                                    |
| the_patient_has_comorbidities | Type of Data        | Name (String)                                                                                                       |
| the_patient_has_comorbidities | Example             | 0                                                                                                                   |
| the_patient_has_comorbidities | Filled              | 25.07%                                                                                                              |
| the_patient_has_comorbidities | Possible Values     | 0 = You don't have the Attribute,                                                                                   |
| the_patient_has_comorbidities | Possible Values     | 1 = Has the Attribute,                                                                                              |
| the_patient_has_comorbidities | Possible Values     | "" = Missing                                                                                                        |
| the_patient_has_comorbidities | Data Quality Issues | Replace values "" = Missing, to 0 = You do not have the Attribute.                                                  |
| user_age_at_validation_date   | Description         | Age of the confirmed case at the date of notification.                                                              |
| user_age_at_validation_date   | Type of Data        | Numeric (Integer)                                                                                                   |
| user_age_at_validation_date   | Example             | 44                                                                                                                  |
| user_age_at_validation_date   | Filled              | 91.82%                                                                                                              |
| user_age_at_validation_date   | Possible Values     | Values between 0 and 120 years.                                                                                     |
| user_age_at_validation_date   | Data Quality Issues | There are records with no associated age.                                                                           |
| virus_variant                 | Description         | Most common variants of COVID-19 disease                                                                            |
| virus_variant                 | Type of Data        | Nome (String)                                                                                                       |
| virus_variant                 | Example             | Variant501V2                                                                                                        |
| virus_variant                 | Filled              | 0.19%                                                                                                               |
| virus_variant                 | Possible Values     | Variant501V2, VariantP1, VariantSGeneDelete, VariantVOC_202012_01, VARIANT_OTHER                                    |
| virus_variant                 | Data Quality Issues | Some records do not have an associated variant.                                                                     |
| virus_variant_other           | Description         | Remaining variants of COVID-19 disease                                                                              |
| virus_variant_other           | Type of Data        | Name (String)                                                                                                       |
| virus_variant_other           | Example             | B.1                                                                                                                 |
| virus_variant_other           | Filled              | 0.1%                                                                                                                |
| virus_variant_other           | Possible Values     | A.21, P.2, B.1.2, entre outros                                                                                      |
| virus_variant_other           | Data Quality Issues | There are no data quality problems to present, since it is a complementary column and is linked to "virus_variant". |
| which_country                 | Description         | Identifies the country where the confirmed case was during the incubation period.                                   |
| which_country                 | Type of Data        | Name (String)                                                                                                       |
| which_country                 | Example             | France                                                                                                              |
| which_country                 | Filled              | 0.57%                                                                                                               |
| which_country                 | Possible Values     | ISO 3166 list of countries                                                                                          |
| which_country                 | Data Quality Issues | Replace blank values with "NA" - Not applicable                                                                     |

### Classification Results

|                                                   |                         |                   |
|---------------------------------------------------|-------------------------|-------------------|
| s:                                                | t:                      | sm:               |
| 1 = {All comorbidities, symptoms, age and gender} | 1 = Logistic Regression | 1 = Oversampling  |
| 2 = {All comorbidities, age and gender}           | 2 = Naive Bayes         | 2 = Undersampling |
| 3 = {Risk comorbidities, age and gender}          | 3 = Decision Tree       |                   |
| 4 = {All comorbidities, symptoms and age}         | 4 = SVM                 |                   |
| 5 = {All comorbidities and symptoms}              | 5 = Deep Learning       |                   |
| 6 = {All comorbidities}                           |                         |                   |
| 7 = {All comorbidities and age}                   |                         |                   |
| 8 = {All comorbidities and gender}                |                         |                   |

Table S2. Patient's Outcome results.

| Scenario (s) | Classification Algorithms (t) | Sampling Methods |             |             |               |             |             |
|--------------|-------------------------------|------------------|-------------|-------------|---------------|-------------|-------------|
|              |                               | Oversampling     |             |             | Undersampling |             |             |
|              |                               | Accuracy         | Sensitivity | Specificity | Accuracy      | Sensitivity | Specificity |
| s = 1        | t = 1                         | 88.82%           | 85.80%      | 91.81%      | 87.08%        | 77.56%      | 96.59%      |
|              | t = 2                         | 62.11%           | 96.19%      | 28.44%      | 62.05%        | 95.84%      | 28.24%      |
|              | t = 3                         | 90.99%           | 86.79%      | 95.14%      | 87.62%        | 82.81%      | 92.43%      |
|              | t = 5                         | 89.32%           | 84.41%      | 94.18%      | 89.57%        | 84.24%      | 94.89%      |
| s = 2        | t = 1                         | 88.25%           | 83.46%      | 92.99%      | 88.17%        | 84.04%      | 92.30%      |
|              | t = 2                         | 58.60%           | 96.66%      | 21.00%      | 59.05%        | 96.52%      | 21.56%      |
|              | t = 3                         | 88.94%           | 84.43%      | 93.39%      | 87.52%        | 81.72%      | 93.25%      |
|              | t = 5                         | 88.35%           | 83.38%      | 93.26%      | 88.00%        | 97.18%      | 88.82%      |
| s = 3        | t = 1                         | 87.63%           | 79.25%      | 95.92%      | 88.00%        | 83.77%      | 92.23%      |
|              | t = 2                         | 57.79%           | 96.93%      | 19.12%      | 60.72%        | 97.20%      | 24.27%      |
|              | t = 3                         | 88.91%           | 84.60%      | 93.16%      | 88.27%        | 84.11%      | 92.43%      |
|              | t = 5                         | 88.17%           | 81.44%      | 94.82%      | 88.41%        | 85.40%      | 91.41%      |
| s = 4        | t = 1                         | 88.65%           | 85.90%      | 91.39%      | 88.34%        | 83.42%      | 93.25%      |
|              | t = 2                         | 62.14%           | 96.27%      | 28.43%      | 62.15%        | 96.18%      | 28.15%      |
|              | t = 3                         | 90.67%           | 86.08%      | 95.20%      | 88.31%        | 82.26%      | 94.34%      |
|              | t = 5                         | 89.19%           | 85.12%      | 93.21%      | 88.54%        | 82.88%      | 94.21%      |
| s = 5        | t = 1                         | 65.50%           | 92.86%      | 38.47%      | 87.66%        | 82.19%      | 93.12%      |
|              | t = 2                         | 61.95%           | 96.12%      | 28.14%      | 64.54%        | 97.27%      | 31.83%      |
|              | t = 3                         | 66.58%           | 93.81%      | 39.67%      | 66.18%        | 97.07%      | 35.31%      |
|              | t = 5                         | 66.07%           | 94.69%      | 38.40%      | 71.39%        | 94.61%      | 48.19%      |
| s = 6        | t = 1                         | 58.65%           | 96.75%      | 21.00%      | 58.64%        | 96.70%      | 21.03%      |
|              | t = 2                         | 58.62%           | 96.75%      | 20.96%      | 58.17%        | 98.30%      | 18.06%      |
|              | t = 3                         | 58.72%           | 96.80%      | 21.08%      | 58.17%        | 98.77%      | 17.59%      |
|              | t = 5                         | 58.66%           | 96.80%      | 20.98%      | 60.42%        | 96.11%      | 24.74%      |
| s = 7        | t = 1                         | 88.13%           | 84.80%      | 91.41%      | 88.14%        | 79.20%      | 97.01%      |
|              | t = 2                         | 58.72%           | 96.68%      | 21.21%      | 61.13%        | 97.41%      | 24.88%      |
|              | t = 3                         | 88.13%           | 84.80%      | 91.41%      | 87.76%        | 83.90%      | 91.61%      |
|              | t = 5                         | 58.68%           | 96.95%      | 21.16%      | 87.69%        | 87.18%      | 88.21%      |
| s = 8        | t = 1                         | 58.65%           | 96.76%      | 20.99%      | 60.86%        | 97.00%      | 24.74%      |
|              | t = 2                         | 58.56%           | 96.67%      | 20.91%      | 58.23%        | 98.43%      | 18.06%      |
|              | t = 3                         | 58.93%           | 96.35%      | 21.95%      | 57.76%        | 97.95%      | 17.59%      |
|              | t = 5                         | 58.60%           | 96.71%      | 20.95%      | 60.55%        | 96.38%      | 24.74%      |
